# Supplementary material for: Silica-based monoliths functionalized with DTPA for the removal of transition and lanthanide ions from aqueous solutions
Source: Royal Society of Chemistry journal article supplement (doi:10.1039/d4dt00388h), 2024-01-01
Supplement: d4dt00388h1.pdf [file d4dt00388h1.pdf]

# ELECTRONIC SUPPLEMENTARY INFORMATION

## Silica-based monoliths functionalized with DTPA for the removal of transition and lanthanide ions from aqueous solutions†

Gioele Ancora<sup>a</sup>, Stefano Marchesi<sup>a</sup>, Mauro Botta<sup>a</sup>, Leonardo Marchese<sup>a</sup>, Fabio Carniato<sup>a\*</sup>, and  
Chiara Bisio<sup>a,b\*</sup>

<sup>a</sup> Dipartimento di Scienze e Innovazione Tecnologica, Università degli Studi del Piemonte Orientale  
“Amedeo Avogadro”, Viale Teresa Michel 11, 15121-Alessandria (Italy)

<sup>b</sup> CNR-SCITEC Istituto di Scienze e Tecnologie Chimiche “G. Natta”, Via C. Golgi 19, 20133-  
Milano (Italy)

\*E-mail: [chiara.bisio@uniupo.it](mailto:chiara.bisio@uniupo.it); [fabio.carniato@uniupo.it](mailto:fabio.carniato@uniupo.it)

\*Fax: +39 0131360250; Tel: +39 0131360217, +39 0131360216

1) Figures:

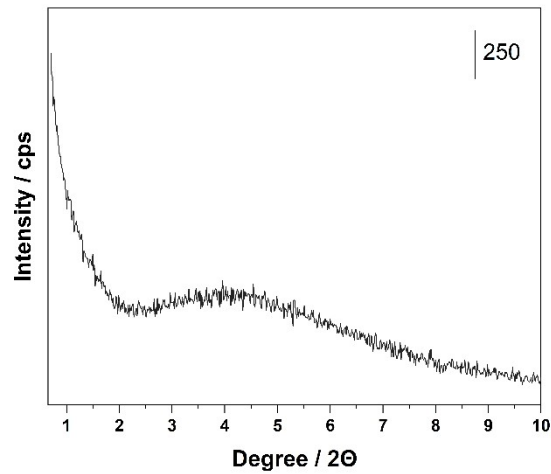

Figure S1. X-ray powder diffractogram of MONO.

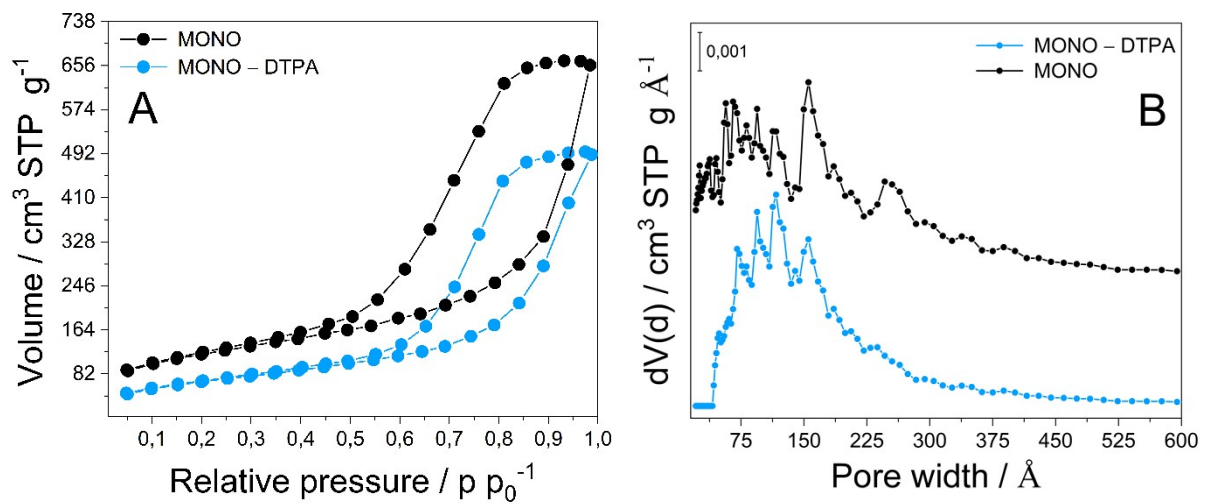

Figure S2:  $N_2$  adsorption/desorption isotherms at 77K (A) and Pore Volume distribution (B) of MONO (-●-) and MONO-DTPA (-●-).

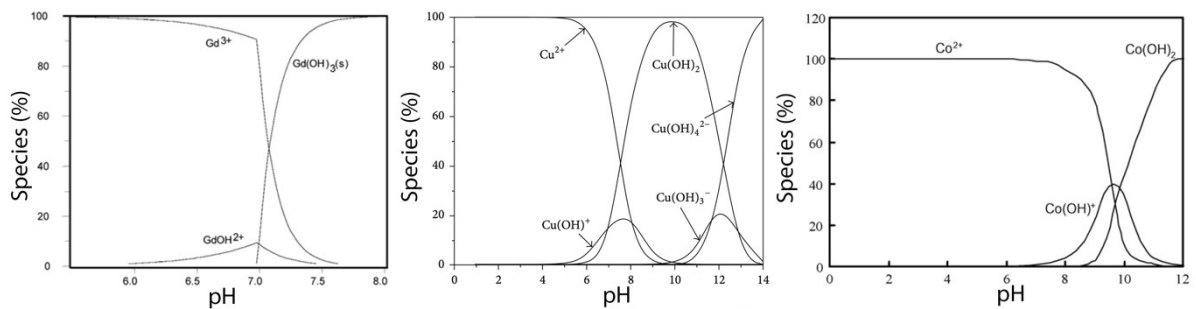

Figure S3. Speciation diagram of  $Gd^{3+}$ ,  $Cu^{2+}$  and  $Co^{2+}$  ions as a function of pH.<sup>58-60</sup>

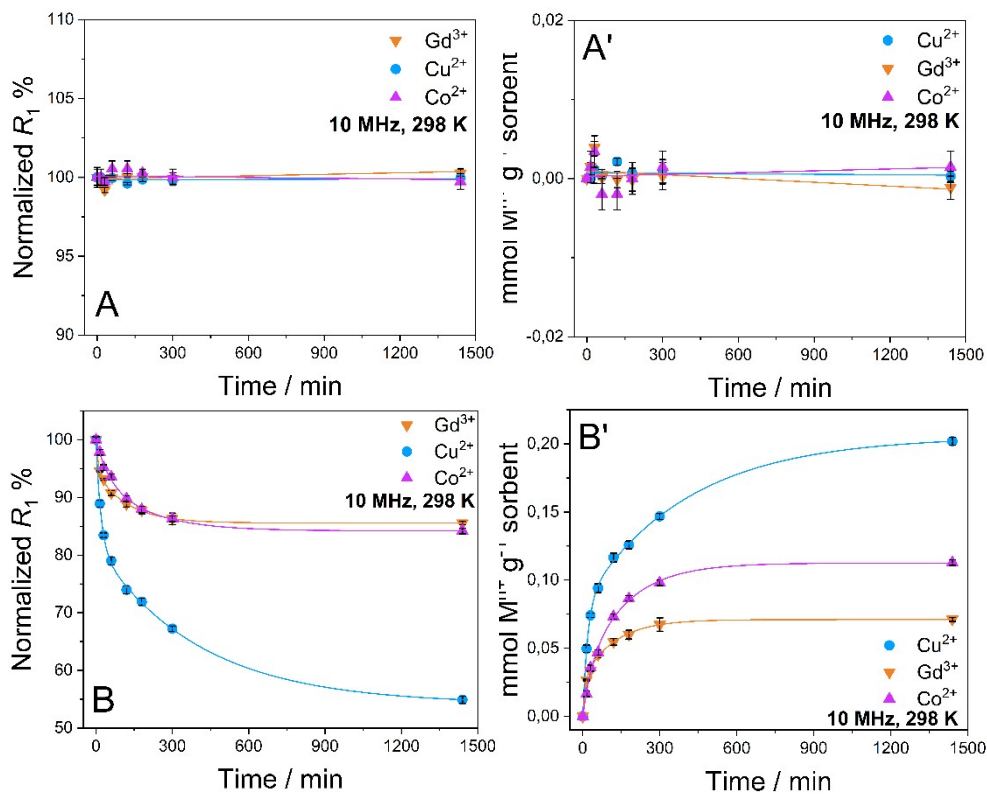

**Figure S4.** A, B)  $R_1$  percentage decrease overtime; A') amounts of  $Cu^{2+}$ ,  $Co^{2+}$  and  $Gd^{3+}$  in mmol of captured metal per g of MONO overtime; B') amounts of  $Cu^{2+}$ ,  $Co^{2+}$  and  $Gd^{3+}$  in mmol of captured metal per g of MONO-APTS overtime; (the points represent the mean value and the error bars indicate the standard deviation;  $n = 3$ ).

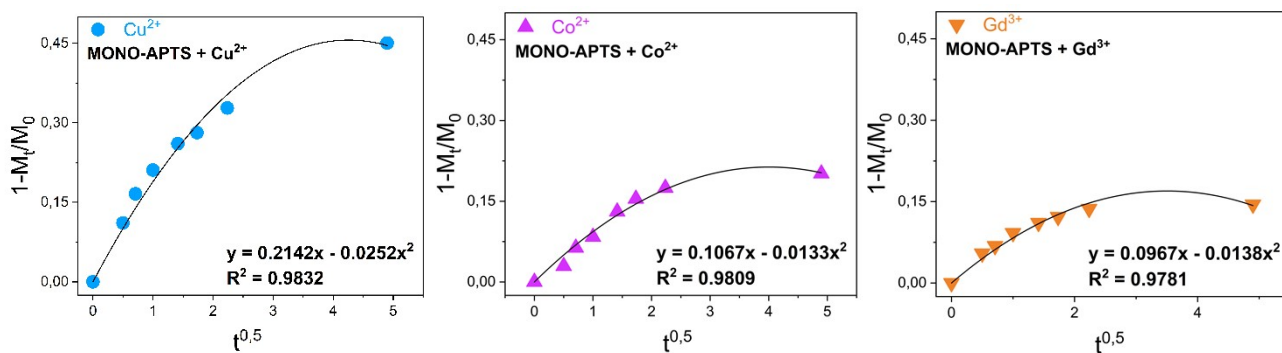

**Figure S5.** Kinetic analysis of the uptake data for MONO-APTS sample.

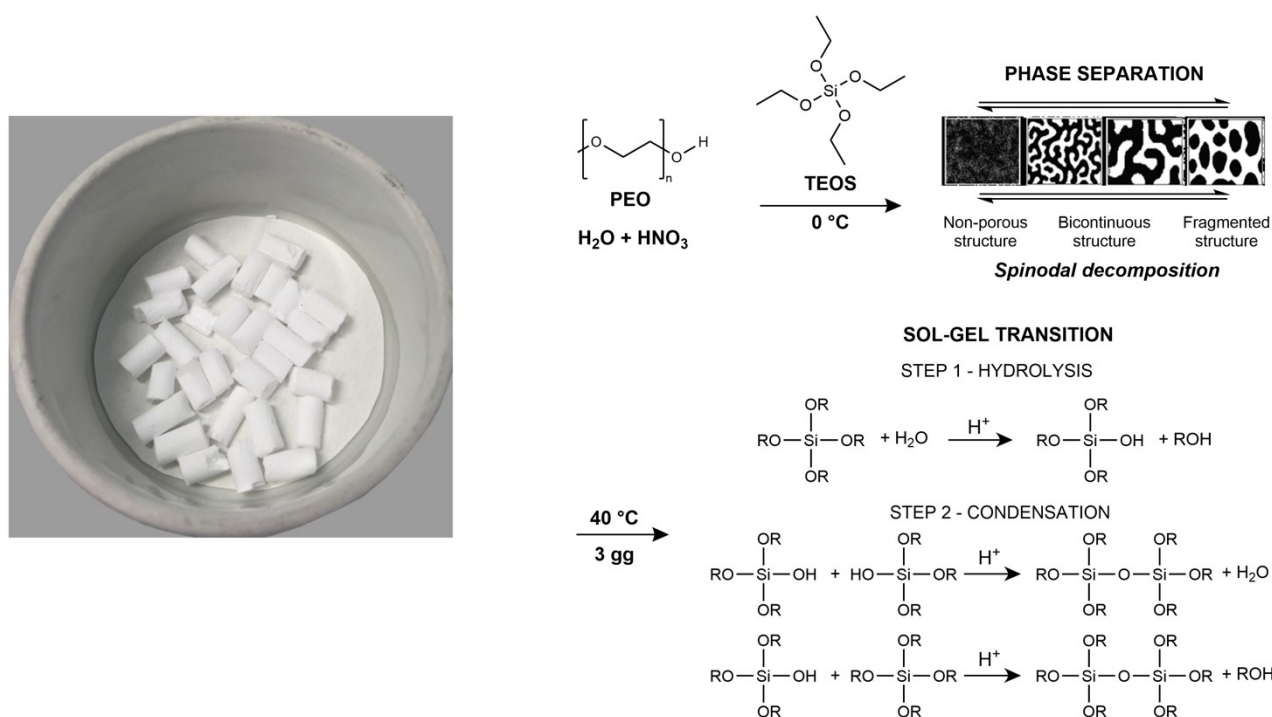

Figure S6. Digital image (left) and synthesis mechanism of MONO (right).

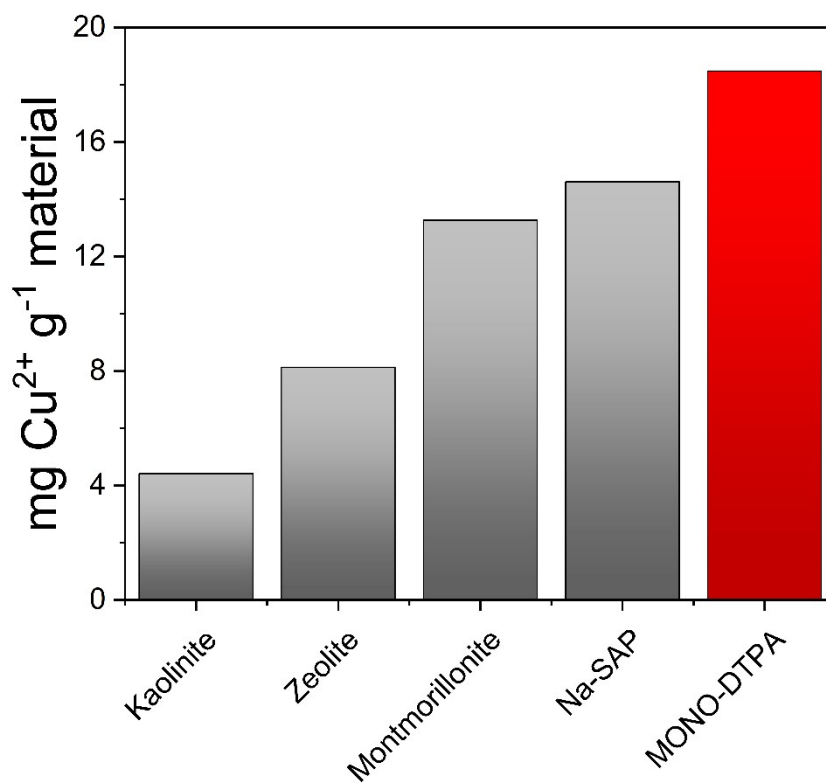

Figure S7. Maximum adsorption capacities of Cu<sup>2+</sup> ions of MONO-DTPA, Kaolinite clay,<sup>65</sup> Zeolite,<sup>66</sup> Montmorillonite clay,<sup>67</sup> sodium exchanged saponite clay (Na-SAP).<sup>47</sup>

**Tables:**

| Sample    | C [%]         | N [%]         | H [%]         | [APTS]<br>(mmol/g) | [DTPA]<br>(mmol/g) |
|-----------|---------------|---------------|---------------|--------------------|--------------------|
| MONO      | 0.157 ± 0.029 | -             | 1.297 ± 0.053 | -                  | -                  |
| MONO-APTS | 4.832 ± 0.041 | 1.894 ± 0.018 | 1.571 ± 0.078 | 1.35 ± 0.02        | -                  |
| MONO-DTPA | 9.312 ± 0.028 | 3.171 ± 0.010 | 2.226 ± 0.034 | -                  | 0.31 ± 0.01        |

**Table S1.** Average weight percentages (%) of carbon, nitrogen and hydrogen, and concentration (mmol/g) of APTS and DTPA obtained by CHN analysis on MONO, MONO-APTS and MONO-DTPA; (standard deviations were calculated from a triplicate set of analyses).

| Sample    | Specific Surface Area (SSA)<br>[m <sup>2</sup> /g] | Total Pore Volume [cm <sup>3</sup> /g] | Mesopore Volume [cm <sup>3</sup> /g] | Macropore Volume [cm <sup>3</sup> /g] | Average Pore Diameter [Å] |
|-----------|----------------------------------------------------|----------------------------------------|--------------------------------------|---------------------------------------|---------------------------|
| MONO      | 430                                                | 0.999                                  | 0.939                                | 0.060                                 | 155                       |
| MONO-DTPA | 254                                                | 0.739                                  | 0.711                                | 0.028                                 | 117                       |

**Table S2.** Specific surface area (SSA), volume and average pore diameter values for MONO and MONO-DTPA samples.

| Sample                       | mg M <sup>n+</sup> / g sorbent | % Captured M <sup>n+</sup><br>[a] | [APTS]<br>(mmol / g) | Captured<br>[M <sup>n+</sup> ]<br>(mmol / g) |
|------------------------------|--------------------------------|-----------------------------------|----------------------|----------------------------------------------|
| MONO + Gd <sup>3+</sup>      | 0.18 ± 0.23                    | 0.0 ± 0.0                         | -                    | 0.00 ± 0.01                                  |
| MONO + Cu <sup>2+</sup>      | 0.00 ± 0.00                    | 0.1 ± 0.0                         | -                    | 0.00 ± 0.01                                  |
| MONO + Co <sup>2+</sup>      | 0.09 ± 0.11                    | 0.3 ± 0.3                         | -                    | 0.00 ± 0.01                                  |
| MONO-APTS + Gd <sup>3+</sup> | 11.19 ± 0.23                   | 14.5 ± 0.3                        | 1.35 ± 0.03          | 0.07 ± 0.02                                  |
| MONO-APTS + Co <sup>2+</sup> | 6.65 ± 0.99                    | 20.1 ± 0.4                        | 1.35 ± 0.03          | 0.11 ± 0.02                                  |
| MONO-APTS + Cu <sup>2+</sup> | 12.83 ± 0.18                   | 45.1 ± 0.6                        | 1.35 ± 0.03          | 0.20 ± 0.03                                  |

[a] = in reference to the initial concentration value of each metal solution used (10 mM)

**Table S3.** Amount of Gd<sup>3+</sup>, Cu<sup>2+</sup> and Co<sup>2+</sup> metal ions captured by MONO and MONO-APTS from their respective aqueous solutions after 24h, expressed as mg M<sup>n+</sup> / g sorbent, mmol/g and % captured M<sup>n+</sup>; (standard deviations were calculated from a triplicate set of analyses).

| Sample    | Gd <sup>3+</sup>                              | Co <sup>2+</sup>                              | Cu <sup>2+</sup>                              |
|-----------|-----------------------------------------------|-----------------------------------------------|-----------------------------------------------|
| MONO-APTS | $k = 0.0967 \text{ s}^{-1}$<br>$R^2 = 0.9781$ | $K = 0.1067 \text{ s}^{-1}$<br>$R^2 = 0.9809$ | $k = 0.2142 \text{ s}^{-1}$<br>$R^2 = 0.9832$ |

**Table S4.** Kinetic constants ( $k$ ) and determination coefficient ( $R^2$ ) obtained by the fitting of the NMR relaxometric data of Fig. S5.

| <b>Adsorbent</b> | <b>Uptake capacity<br/>(mg/g)</b> | <b>References</b> |
|------------------|-----------------------------------|-------------------|
| MONO-DTPA        | 18.48                             | -                 |
| Kaolinite        | 4.42                              | 65                |
| Zeolite          | 8.13                              | 66                |
| Montmorillonite  | 13.27                             | 67                |
| Na-SAP           | 14.61                             | 47                |

**Table S5.** Maximum adsorption capacities of  $\text{Cu}^{2+}$  ions captured by different materials.
